# Supplementary material
Source: Elsevier journal article supplement (https://www.sciencedirect.com/science/article/pii/S1575181318303516)
Supplement: mmc1 [file S1575181318303516:mmc1.pdf]

## MATERIAL SUPLEMENTARIO

**Anexo 1:** Cuestionario a alumnos ayudantes de 3ro, 4to y 5to año de la carrera de Medicina.

Estimado estudiante:

Tu opinión resulta realmente de gran valor para la investigación que nos ocupa sobre el desarrollo de las habilidades investigativas. En virtud de ello, rogamos tu colaboración respondiendo, con absoluta sinceridad, la presente encuesta en torno a las habilidades investigativas que ha desarrollado durante la carrera, por lo cual te agradecemos de antemano.

Edad: \_\_\_\_\_

Sexo: \_\_\_\_ Masculino \_\_\_\_ Femenino

Especialidad de la Ayudantía: \_\_\_\_\_

Año académico: \_\_\_\_\_ 3ro \_\_\_\_\_ 4to \_\_\_\_\_ 5to

1. ¿Cómo autoevalúas tus conocimientos y habilidades en el empleo de catálogos, libros de descriptores y elaboración de fichas bibliográficas?

\_\_\_\_\_ Adecuada \_\_\_\_\_ Medianamente adecuada \_\_\_\_\_ Inadecuada

2. ¿Cómo autoevalúas tus conocimientos y habilidades en relación con la formulación de un problema científico, objetivos investigativos e hipótesis de investigación, a partir de un problema de salud?

\_\_\_\_\_ Adecuada \_\_\_\_\_ Medianamente adecuada \_\_\_\_\_ Inadecuada

3. ¿Cómo autoevalúas tus conocimientos y habilidades en la selección de la población, la muestra y el tipo de muestreo a emplear?

\_\_\_\_\_ Adecuada \_\_\_\_\_ Medianamente adecuada \_\_\_\_\_ Inadecuada

4. ¿Cómo autoevalúas tus conocimientos y habilidades en la selección, elaboración y aplicación de métodos, técnicas e instrumentos?

\_\_\_\_\_ Adecuada \_\_\_\_\_ Medianamente adecuada \_\_\_\_\_ Inadecuada

5. ¿Cómo autoevalúas tus conocimientos y habilidades en el análisis y procesamiento de la información a través de las diferentes técnicas estadísticas?

\_\_\_\_\_ Adecuada \_\_\_\_\_ Medianamente adecuada \_\_\_\_\_ Inadecuada

6. ¿Cómo autoevalúas tus conocimientos y habilidades en la interpretación y discusión de los resultados que se presentan en tablas y gráficos?

\_\_\_\_\_ Adecuada \_\_\_\_\_ Medianamente adecuada \_\_\_\_\_ Inadecuada

7. ¿Cómo autoevalúas tus conocimientos y habilidades en la elaboración de conclusiones y recomendaciones?

\_\_\_\_\_ Adecuada \_\_\_\_\_ Medianamente adecuada \_\_\_\_\_ Inadecuada

8. ¿Cómo autoevalúas tus conocimientos y habilidades en la elaboración de informes finales de investigación?

\_\_\_ Adecuada \_\_\_ Medianamente adecuada \_\_\_ Inadecuada

9. ¿Cómo autoevalúas tus conocimientos y habilidades en la presentación de los informes finales con el empleo de las TIC (PowerPoint)?

\_\_\_ Adecuada \_\_\_ Medianamente adecuada \_\_\_ Inadecuada
